# Supplementary material for: Bindung und seelische Gesundheit von ehemaligen Wochenkrippenkindern
Source: Springer Nature journal article supplement (doi:10.1007/s00278-023-00687-1), 2023-09-20
Supplement: MOESM1 [file 26065114]

**Online-Supplement: Tabelle OA** Ergebnisse der multiplen linearen Regressionsmodelle ( $N= 272$ ) im finalen Modell (Schritt 2)

|                                                                       | Alter            |         | Geschlecht       |         | Schulbildung     |         | Familienstand    |         | Gruppe (WK=0/ VG=1) |         |
|-----------------------------------------------------------------------|------------------|---------|------------------|---------|------------------|---------|------------------|---------|---------------------|---------|
|                                                                       | B $\pm$ SE       | $\beta$ | B $\pm$ SE          | $\beta$ |
| <b>PHQ-4</b>                                                          | -0.05 $\pm$ 0.02 | -.16**  | -1.98 $\pm$ 0.39 | -.13*   | -0.57 $\pm$ 0.34 | -.16**  | -0.06 $\pm$ 0.34 | -.02    | -3.31 $\pm$ 0.41    | -.46*** |
| <b>Somatic Symptom Scale-8</b>                                        | -0.04 $\pm$ 0.04 | -.07    | -3.18 $\pm$ 0.78 | -.24*** | -2.28 $\pm$ 0.65 | -.20*** | 0.42 $\pm$ 0.65  | .04     | -3.69 $\pm$ 0.85    | -.26*** |
| <b>Anzahl positiver Screenings für Diagnosen im CID-S: Lebenszeit</b> | -0.06 $\pm$ 0.13 | -.02    | -0.72 $\pm$ 0.27 | -.11**  | -0.39 $\pm$ 0.23 | -.07    | 0.30 $\pm$ 0.23  | .06     | -4.92 $\pm$ 0.30    | -.71*** |
| <b>Anzahl positiver Screenings für Diagnosen im CID-S: 12 Monate</b>  | -0.28 $\pm$ 0.14 | -.11*   | -0.76 $\pm$ 0.28 | -.15**  | -0.58 $\pm$ 0.24 | -.13*   | 0.03 $\pm$ 0.24  | .01     | -2.77 $\pm$ 0.31    | -.49*** |
| <b>ECR-RD BANG</b>                                                    | -0.03 $\pm$ 0.01 | -.23*** | -0.58 $\pm$ 0.16 | -.20*** | -0.02 $\pm$ 0.13 | -.01    | 0.07 $\pm$ 0.13  | .03     | -1.26 $\pm$ 0.18    | -.40*** |
| <b>ECR-RD BVER</b>                                                    | -0.02 $\pm$ 0.01 | -.15*   | -0.15 $\pm$ 0.16 | -.06    | -0.25 $\pm$ 0.13 | -.10    | -0.15 $\pm$ 0.13 | -.06    | -1.29 $\pm$ 0.17    | -.44*** |
| <b>ADA</b>                                                            | 0.34 $\pm$ 0.08  | -.24*** | -0.19 $\pm$ 0.17 | -.07    | -0.05 $\pm$ 0.14 | -.02    | 0.10 $\pm$ 0.14  | .04     | -1,29 $\pm$ 0.18    | -.42*** |

*Anmerkungen:* Multiple lineare Regression: Einschluss 1. Schritt: Alter, Geschlecht, Schulbildung, Familienstand; 2. Schritt: Gruppe (0 = Wochenkrippe, 1 = Vergleichsgruppe). Adj.R<sup>2</sup>= korrigiertes R-Quadrat;  $\Delta R^2$ = zusätzliche Varianzaufklärung durch Einschluss der Variable Gruppe in Schritt 2. B = unstandardisierter Koeffizient; SE = Standardfehler;  $\beta$  = standardisierter Koeffizient. PHQ-4 = Patient Health Questionnaire Ultrakurzform; CID-S = Composite International Diagnostic Screener; ECR-RD = Experiences in Close Relationships –revidierte deutschsprachige Version; BANG = Bindungsangst; BVER = Bindungsvermeidung; ADA = Adult Disorganized Attachment

Signifikanzniveau: \* $p < .05$ , \*\* $p < .01$ , \*\*\* $p < .001$
